# Supplementary material
Source: HighWire-hosted journal article supplement (https://www.cmaj.ca/content/suppl/2003/12/02/160.9)
Supplement: part2.pdf [file part2.pdf]

## 2. Recommendations on obesity and weight loss

Lawrence A. Leiter, MD; Darlene Abbott, RN;  
Norman R.C. Campbell, MD; Rena Mendelson, DSc;  
Richard I. Ogilvie, MD; Arun Chockalingam, MS, PhD

### Abstract

**Objective:** To provide updated, evidence-based recommendations concerning the effects of weight loss and maintenance of healthy weight on the prevention and control of hypertension in otherwise healthy adults (except pregnant women).

**Options:** The main options are to attain and maintain a healthy body weight (body mass index [BMI] 20–25 kg/m<sup>2</sup>) or not to do so. For those at risk for hypertension, weight loss and maintenance of healthy weight may prevent the condition. For those who have hypertension, weight loss and maintenance of healthy weight may reduce or obviate the need for antihypertensive medications.

**Outcomes:** The health outcome considered was change in blood pressure. Because of insufficient evidence, no economic outcomes were considered.

**Evidence:** A MEDLINE search was conducted for the years 1992–1996 with the terms hypertension and obesity in combination and antihypertensive therapy and obesity in combination. Other relevant evidence was obtained from the reference lists of the articles identified, from the personal files of the authors and through contacts with experts. The articles were reviewed, classified according to study design and graded according to level of evidence.

**Values:** A high value was placed on the avoidance of cardiovascular morbidity and premature death caused by untreated hypertension.

**Benefits, harms and costs:** Weight loss and the maintenance of healthy body weight reduces the blood pressure of both hypertensive and normotensive people. The indirect benefits of a healthy body weight are well known. The negative effects of weight loss are primarily the frustrations associated with attaining and maintaining a healthy weight. The costs associated with weight loss programs were not measured in the studies reviewed.

**Recommendations:** (1) It is recommended that health care professionals determine weight (in kilograms), height (in metres) and BMI for all adults. (2) To reduce blood pressure in the population at large, it is recommended that Canadians attain and maintain a healthy BMI (20–25). (3) All overweight hypertensive patients (BMI greater than 25) should be advised to reduce their weight.

**Validation:** These recommendations are similar to those of the World Hypertension League, the National High Blood Pressure Education Program Working Group on Primary Prevention of Hypertension, the Canadian Hypertension Society and the Canadian Coalition for High Blood Pressure Prevention and Control. They have not been clinically tested.

**Sponsors:** The Canadian Hypertension Society, the Canadian Coalition for High Blood Pressure Prevention and Control, the Laboratory Centre for Disease Control at Health Canada, and the Heart and Stroke Foundation of Canada.

Weight loss is often considered for the treatment of hypertension, yet the specifics of the responses to treatment are not well known. In 1989 a consensus conference sponsored by the Canadian Coalition for High Blood Pressure Prevention and Control and the Canadian Hypertension Society recommended that weight loss may help in both the prevention and the treatment of hypertension.<sup>1</sup> Those recommendations were based on relatively sparse data. Since then, a number of new studies have been published on the relation between hypertension and obesity, as well as on the relation between weight loss and blood pressure.

In 1992 the Canadian Heart Health Survey highlighted the importance of obesity as a public health problem.<sup>2</sup> At that time in Canada 35% of men and 27% of women were obese (body mass index [BMI] greater than 27). Guidelines for BMI (which is calculated by dividing body weight, in kilograms, by the square of height, in metres) have been published for Canada.<sup>3</sup> A BMI above 27 is associated with increased health risks, including hypertension.<sup>4</sup> The causes of the higher blood pressure associated with obesity are likely multiple<sup>5</sup> and include insulin resistance or hyperinsulinemia,

### Special supplement

Dr. Leiter (chair) is with the Departments of Medicine and Nutritional Sciences and Dr. Ogilvie is with the Department of Medicine, University of Toronto, Toronto, Ont.; Ms. Abbott is with Foothills Hospital, Calgary, Alta.; Dr. Campbell is with the Divisions of General Internal Medicine, Geriatrics and Nephrology, and the Departments of Medicine and of Pharmacology and Therapeutics, University of Calgary, Calgary, Alta.; Dr. Mendelson is Associate Vice-President, Academic, Ryerson Polytechnic University, Toronto, Ont.; and Dr. Chockalingam is with the Adult Health Division, Health Canada, Ottawa, Ont.

*This article has been peer reviewed.*

overactivity of the sympathetic nervous system and alterations in the renin-angiotensin system.

The primary objective of these guidelines is to identify the evidence for and provide evidence-based recommendations to health care professionals about the relation between obesity and hypertension and the response of blood pressure to weight loss.

## Methods

A complete description of the methods for these guidelines is given in part 1 of this supplement.<sup>6</sup>

The chair and members of the panel were selected by the Organizing Committee for the lifestyle modification recommendations to obtain a spectrum of health care professionals and scientists with expertise and interest in the areas of hypertension, obesity and heart health.

The initial MEDLINE search was performed using the terms hypertension and obesity in combination and antihypertensive therapy and obesity in combination for English-language studies published between 1992 and 1996. Another search was performed just before publication using the terms hypertension, obesity and controlled clinical trial in combination for the years 1996–1998. Additional articles and articles published before 1992 were identified by reviewing the reference lists of the identified articles, were found in the personal files of the panel members and were suggested by other experts. For the primary recommendations regarding the efficacy of weight loss, the results of randomized controlled trials were used. However, epidemiologic studies and nonrandomized intervention trials were also reviewed. The data from the randomized controlled trials were interpreted in the context of the more extensive data obtained from studies with these other designs, which were used for the secondary recommendations. The principles for grading the evidence and the recommendations were based on those previously used by the Canadian Hypertension Society<sup>7</sup> and are summarized in part 1 of this supplement.<sup>6</sup> An attempt was made to reach a consensus on all recommendations. The evidence and the recommendations were presented for comment to the other expert panels for this guidelines series, submitted for review to major Canadian organizations and presented at an international conference on preventive cardiology, to allow further national and international input. All revisions were reviewed and assessed by the panel before incorporation into the final document.

## Results

### Observational data

Extensive epidemiologic data support a positive association between body weight and blood pressure. Cross-sectional studies have demonstrated the association in both sexes, for people of different ages and in several ethnic groups. Among Canadian adults younger than 55 years of age, the prevalence of hypertension is at least 5-fold higher for those with a BMI greater than 30 than for those whose BMI is less than 20.<sup>4</sup> The association is similar but less pronounced in older Canadians. In another study of one million North American subjects<sup>8</sup> the odds ratio for hypertension (in comparisons of obese and non-obese subjects) was 2.42 for those aged 20–39 years and 1.54 for those aged 40–64 years.

Similarly, when subjects in the Framingham study<sup>9</sup> were grouped in BMI quintiles, both systolic and diastolic blood pressure increased progressively; the mean difference between the first and fifth quintile was 16 mm Hg for systolic blood pressure and 9 mm Hg for diastolic blood pressure. The Nurses Health Study<sup>10</sup> reported that hypertension was 2 to 6 times more prevalent among heavier women (BMI of 29 or above) than among less heavy women (BMI less than 22). Other studies have indicated that the association is even stronger for people with relatively higher abdominal fat.<sup>11</sup>

Prospective cohort studies have also shown a correlation between weight gain and increases in blood pressure.<sup>12</sup> In the Framingham study, for each 4.5 kg of weight gain there was an associated increase in systolic blood pressure of 4 mm Hg in both men and women.<sup>9</sup>

To facilitate the identification of a risk of having hypertension or cardiovascular disease due to obesity or of these conditions developing, a reliable objective assessment is required. BMI is simple to calculate, is based on readily available clinical data and provides a basis for both assessing cardiovascular prognosis and monitoring change. BMI has been used extensively to generate prognostic cardiovascular data and is superior to body weight alone for the assessment of obesity. Other measures of obesity may predict cardiovascular disease more accurately than BMI but require measurements not performed routinely in clinical practice. Therefore, BMI is currently the most useful clinical assessment on which to base recommendations for weight loss, to assess cardiovascular risk, to establish therapeutic goals and to monitor change.

### Recommendation

- Body mass index should be routinely assessed for all adult patients (grade D recommendation).

### Randomized controlled trials

Several randomized controlled trials of weight loss have demonstrated that a reduction in weight is associated with a reduction in blood pressure. Table 1 summarizes the data from randomized controlled trials of weight reduction in overweight hypertensive patients.<sup>13–20</sup> In all of the trials except one,<sup>15</sup> weight reduction was associated with a reduction in mean blood pressure (level II evidence), although the lack of an appropriate statistical analysis was a limitation for some of the studies<sup>13,17,18</sup> (Table 1). For overweight patients, the efficacy of weight loss in reducing blood pressure is similar to that of single antihypertensive drug therapy.<sup>16,17</sup>

The Treatment of Mild Hypertension Study provides level II evidence that the effect of antihypertensive medications on blood pressure is additive to that achieved by weight loss alone.<sup>21</sup> However, patients randomly assigned to receive  $\beta$ -blocker therapy lost less weight than those receiving other drug therapies. The Trial of Antihypertensive In-

terventions and Management<sup>22</sup> (TAIM) revealed an additive effect of chlorthalidone therapy and weight loss on blood pressure in obese subjects.

## Recommendations

- Overweight hypertensive patients (BMI greater than 25) should be advised to reduce their weight (grade B recommendation).
- Overweight hypertensive patients receiving antihypertensive drugs should be advised to lose weight for additional antihypertensive effect (grade B recommendation).

Table 2 summarizes the data from randomized controlled trials of weight reduction in overweight normotensive people.<sup>23-25</sup> In this population weight reduction is associated with a reduction in blood pressure, which indicates the potential

utility of weight reduction in preventing hypertension (level II evidence). The phase I study of the Trials of Hypertension Prevention<sup>24</sup> showed that weight reduction was more effective than other lifestyle strategies in preventing hypertension.

## Recommendation

- Adults should be encouraged to attain and maintain a healthy body weight (BMI of 20–25) to prevent or forestall the development of hypertension (grade B recommendation).

## Nonrandomized trials and post hoc analysis of intervention trials

Evidence from nonrandomized trials and from post hoc analysis of intervention trials constitutes level III evidence.

**Table 1: Studies including effects of weight loss on blood pressure (BP) in hypertensive people**

| Study design                      | Subjects                                                      | Intervention                                                                                                                                                        | Duration     | Change in body weight, kg | Change in BP, mm Hg                                                                                                                                                      |
|-----------------------------------|---------------------------------------------------------------|---------------------------------------------------------------------------------------------------------------------------------------------------------------------|--------------|---------------------------|--------------------------------------------------------------------------------------------------------------------------------------------------------------------------|
| RCT <sup>13*</sup>                | 49 hypertensive patients                                      | Dietitian counselling = 15<br>Diet sheet = 14<br>MD advice = 20                                                                                                     | 1 yr         | -5.1<br>-2.6<br>-2.2      | -11.9/6.9<br>-5.7/3.0<br>-11.2/5.3                                                                                                                                       |
| RCT <sup>14</sup>                 | 107 overweight, hypertensive patients                         | No antihypertensives, weight reduction program = 24<br>Antihypertensives, weight reduction program = 57<br>Antihypertensives, no dietary program = 26               | 6 mo         | -8.8<br>-9.8†<br>-0.7     | 75% achieved normal BP<br>61% achieved normal BP†<br>0% achieved normal BP                                                                                               |
| RCT <sup>15</sup>                 | 54 mildly hypertensive, obese people                          | Behaviourally oriented hypocaloric diet                                                                                                                             | 6 mo         | -3.3‡                     | +5.0/1.5 NS                                                                                                                                                              |
| RCT <sup>16</sup>                 | 56 overweight patients, < 55 yr                               | Hypocaloric diet = 20<br>Metoprolol = 18<br>Placebo = 18                                                                                                            | 21 wk        | -7.4§<br>+2.0<br>+0.5     | -13.3/9.8‡<br>-9.9/6.2<br>-7.4/3.1                                                                                                                                       |
| RCT <sup>17*</sup>                | 163 of 692 overweight, mildly hypertensive patients, 21–65 yr | Usual care and placebo = 79<br>Weight reduction program and placebo = 84                                                                                            | 6 mo         | -3.5                      | -10.5/8.2<br>-11.9/9.5                                                                                                                                                   |
| RCT <sup>18*</sup>                | 30 obese hypertensive patients                                | 16 dexfenfluramine<br>14 placebo                                                                                                                                    | 3 mo         | -6.0‡<br>-1.4             | -11.0/4.0<br>-9.0/5.1                                                                                                                                                    |
| RCT <sup>19</sup>                 | 61 mildly hypertensive, overweight men                        | 31 hypocaloric diet<br>30 drug therapy, no diet restriction                                                                                                         | 1 yr<br>6 mo | -8.8§                     | -4/3<br>-15/11 ¶                                                                                                                                                         |
| RCT 2 × 2 factorial <sup>20</sup> | 585 obese patients, 60–80 yr                                  | Behaviourally oriented weight loss program v. usual care<br>Sodium restriction, group counselling v. usual care<br>Weight loss and sodium restriction v. usual care | 29 mo        | -3.8§                     | RR of drug treatment or a cardiovascular event = 0.64‡<br>RR of drug treatment or a cardiovascular event = 0.60<br>RR of drug treatment or a cardiovascular event = 0.47 |

Note: RCT = randomized controlled trial, BP = blood pressure, NS = nonsignificant, RR = relative risk.

\*Statistics not provided.

† $p < 0.05$  compared with group treated with antihypertensives and no dietary program.

‡ $p < 0.05$  compared with placebo.

§ $p < 0.001$ .

¶ $p < 0.002$ .

The TAIM study<sup>22</sup> examined the response of diastolic blood pressure to various combinations of dietary and pharmacologic interventions in 879 mildly hypertensive subjects (baseline weight 88.0 kg, mean BMI 30.4). Over 6 months, the mean weight loss was 4.7 kg, which was associated with an improvement in diastolic blood pressure in all groups. In patients receiving placebo who lost 4.5 kg or more, diastolic blood pressure declined by 11.6 mm Hg. For those who lost less than 4.5 kg, the decrease in diastolic blood pressure was not significantly different from the decrease in those receiving a placebo and eating their usual diet. Over the subsequent 4.5 years of follow-up, those following the weight-loss diet lost 2–3 kg, whereas those eating their usual diet lost no weight. Among those who were able to maintain their weight loss, the 5-year incidence of treatment failure (defined as not remaining on the initial drug therapy) was 23% lower than among those who did not maintain their weight loss.

### Recommendation

- In overweight patients with high blood pressure it should be emphasized that even 4.5 kg of weight loss may reduce their blood pressure (grade C recommendation).

The recommendations on weight loss and hypertension are summarized in Table 3.

### Interpretation

The attainment and maintenance of a healthy body weight can prevent hypertension and can be used as the primary treatment for mild hypertension or as an adjunct to pharmacologic therapy. Weight reduction may also reduce other cardiovascular risk factors, although there are no data from long-term randomized controlled trials demonstrating that weight reduction decreases morbidity and mortality rates. Although the long-term effectiveness of weight loss in the management of hypertension has been questioned, some studies using a multifactorial approach

involving nutrition education, alcohol reduction and physical activity have demonstrated long-term weight and blood pressure reduction.<sup>17,21,24</sup> However, knowledge that even modest weight loss (4.5 kg) can result in improvement in blood pressure and other metabolic abnormalities should help to emphasize the potential important role of weight reduction in blood pressure control.

Unfortunately, the overall results of lifestyle modification to reduce obesity are poor and lead to frustration and pessimism for both the patient and the health care provider.<sup>26</sup> Most long-term trials of weight reduction have found that weight returns to baseline levels after several years, although a few people are able to maintain their reduced weight.<sup>26</sup> Pharmacotherapy for obesity also has substantial problems. Two drugs (fenfluramine and dexfenfluramine) used to assist in weight reduction have recently been withdrawn from the market because they were associated with valvular heart lesions and pulmonary hypertension.<sup>27</sup> Sympathomimetic appetite suppressants are still available but may be associated with increased blood pressure<sup>21</sup> and have limited effectiveness in reducing weight.

Strategies for weight reduction in a hypertensive obese person are no different from those for any other obese person. According to the Canadian Task Force on the Treatment of Obesity, a comprehensive, multifactorial approach is preferred.<sup>26</sup> The approach should employ instruction about diet, increased physical activity and behaviour modification techniques. Among those receiving antihypertensive medications, weight loss may be more difficult in those treated with  $\beta$ -blocking antihypertensive drugs. The selection of initial antihypertensive drug therapy for an obese person should follow the guidelines of the Canadian Hypertension Society<sup>7</sup> (new guidelines will be available later in 1999).

### Validation

These recommendations are similar to those of the World Hypertension League,<sup>28</sup> the National High Blood Pressure Education Program Working Group on Primary

**Table 2: Studies including effects of weight loss on BP in normotensive people**

| Study design                                                                                  | Subjects                                     | Intervention                                                              | Duration | Change in body weight, kg | Change in BP, mm Hg |
|-----------------------------------------------------------------------------------------------|----------------------------------------------|---------------------------------------------------------------------------|----------|---------------------------|---------------------|
| RCT <sup>23</sup>                                                                             | 841                                          | Moderate caloric restriction; group meetings                              | 6 mo     | -5.8*                     | -5.1/2.8†           |
|                                                                                               |                                              |                                                                           | 3 yr     | -3.5*                     | -2.4/1.8†           |
| RCT <sup>24</sup>                                                                             | Weight loss intervention 308; usual care 256 | Moderate caloric restriction; group meetings                              | 18 mo    | -3.9*                     | -2.9/2.4*           |
| RCT, 2 × 2 factorial <sup>25</sup><br>Weight loss v. control<br>Sodium restriction v. control | 2382                                         | Moderate caloric restriction;<br>behavioural change;<br>group counselling | 6 mo     | -4.5*                     | -3.7/2.7*           |
|                                                                                               |                                              |                                                                           | 18 mo    | -2.7*                     | -1.8/1.3*           |
|                                                                                               |                                              |                                                                           | 36 mo    | -1.9*                     | -1.3†/0.9†          |

\* $p < 0.001$ .

† $p < 0.05$ .



Prevention of Hypertension,<sup>29</sup> the Canadian Hypertension Society and the Canadian Coalition for High Blood Pressure and Control.<sup>1,30</sup>

### Future research

Several issues remain to be addressed:

- Strategies to promote and sustain long-term weight loss must be developed and tested.
- Long-term studies relating weight loss to cardiovascular morbidity and mortality rates must be undertaken.
- More information must be gathered on the predictors of blood pressure response to weight loss, including patient characteristics, metabolic data and relation between degree of weight loss and blood pressure response.
- Data on the prevalence of hypertension among aboriginal populations in Canada and the response to treatment in these groups are needed.
- The utility of visceral fat as a predictor of blood pressure must be confirmed, and improved, simpler methods of quantifying visceral fat should be developed.
- More information must be gathered on the interactions between weight loss and specific antihypertensive drugs in controlling blood pressure.
- Trials comparing blood pressure responses to specific antihypertensive drugs in obese and non-obese people must be undertaken.

### Conclusion

An increased awareness of the benefits of attaining and maintaining a healthy body weight for overall health and specifically for the prevention and treatment of hypertension is indicated. Future efforts must be geared to better understanding this phenomenon, disseminating and implementing this information and finding the most effective means of sustaining weight loss.

We are grateful for the external reviews of the Canadian Coun-

cil of Cardiovascular Nurses, the Canadian Nurses Association, the Canadian Pharmacists Association, the Canadian Public Health Association, the College of Family Physicians of Canada, the Heart and Stroke Foundation of Canada, Hoechst Marion Roussel and Merck Frosst Canada Inc.

This study was financially supported by Astra Canada, Bayer Inc., Bristol-Myers Squibb Pharmaceutical Group, the Laboratory Centre for Disease Control at Health Canada, Knoll Pharma Inc., Merck Frosst Canada Inc., Searle Canada Inc. and Servier Canada Inc.

Competing interests: None declared for Ms. Abbott and Drs. Chockalingam, Leiter, Mendelson and Ogilvie. Dr. Campbell has received consultancy fees, speaker's fees, educational grants and travel assistance from various pharmaceutical companies.

### References

1. Chockalingam A, Abbott D, Bass M, Battista R, Cameron R, de Champlain J, et al. Recommendations of the Canadian Consensus Conference on Non-pharmacologic Approaches to the Management of High Blood Pressure, Mar. 21-23, 1989, Halifax, Nova Scotia. *CMAJ* 1990;142(12):1397-409.
2. Reeder BA, Angel A, Ledoux M, Rabkin SW, Young TK, Sweet LE, Canadian Heart Health Surveys Research Group. Obesity and its relation to cardiovascular disease risk factors in Canadian adults. *CMAJ* 1992;146(11):2009-19.
3. *Canadian guidelines for healthy weights: promoting healthy weights* [discussion paper]. Ottawa: Health Services and Promotion Branch, Health and Welfare Canada; 1988. Cat no. H39-134/1988E.
4. Rabkin SW, Chen Y, Leiter L, Liu L, Reeder BA, Canadian Heart Health Surveys Research Group. Risk factor correlates of body mass index. *CMAJ* 1997;157(1 Suppl):S26-31.
5. Hall JE. Renal and cardiovascular mechanisms of hypertension in obesity. *Hypertension* 1994;23:381-94.
6. Campbell NRC, Burgess E, Choi BCK, Taylor G, Wilson E, Cl  roux J, et al. Lifestyle modifications to prevent and control hypertension: 1. Methods and an overview of the Canadian recommendations. *CMAJ* 1999;160(9 Suppl):S1-6.
7. Carruthers SG, Laroche P, Haynes RB, Petrasovits A, Schiffrin EL. Report of the Canadian Hypertension Society Consensus Conference: 1. Introduction. *CMAJ* 1993;149(3):289-93.
8. Stamler R, Stamler J, Riedlinger WF, Algera G, Roberts RH. Weight and blood pressure. *JAMA* 1978;240:1607-10.
9. Higgins M, Kamel W, Garrison R, Pinsky J, Stokes J. Hazards of obesity — the Framingham experience. *Acta Med Scand* 1998;243(Suppl):23-36.
10. Manson JE, Willett WC, Stampfer MJ, Colditz GA, Hunter DJ, Hankinson SE, et al. Body weight and mortality among women. *N Engl J Med* 1995;333(11):677-85.
11. Ledoux M, Lambert J, Reeder BA, Despr  s JP, Canadian Heart Health Surveys Research Group. A comparative analysis of weight to height and waist to hip circumference indices as indicators of the presence of cardiovascular disease risk factors. *CMAJ* 1997;157(1 Suppl):S32-8.
12. Huang Z, Willett WC, Manson JE, Rosner B, Stampfer MJ, Speizer FE, et al. Body weight, weight change and risk of hypertension in women. *Ann Intern Med* 1998;128:81-8.
13. Ramsay LE, Ramsay MH, Hettiarachchi J, Davies DL, Winchester J. Weight reduction in a blood pressure clinic. *BMJ* 1978;2:244-5.
14. Reisin E, Abel R, Modan M, Silverberg DS, Eliahou HE, Modan B. Effect of weight loss without salt restriction on the reduction of blood pressure in overweight hypertensive patients. *N Engl J Med* 1978;298:1-6.
15. Haynes RB, Harper AC, Costley R, Johnston M, Logan AG, Flanagan PT, et al. Failure of weight reduction to reduce mildly elevated blood pressure: a randomized trial. *J Hypertens* 1984;2(5):535-9.
16. MacMahon SW, Macdonald GJ, Bernstein L, Andrews G, Balckett RB. Comparison of weight reduction with metoprolol in treatment of hypertension in young overweight patients. *Lancet* 1985;1:1233-96.
17. Oberman A, Wassertheil-Smoller S, Langford HG, Blaufox MD, Davis BR, Blaszkowski T, et al. Pharmacologic and nutritional treatment of mild hypertension: changes in cardiovascular risk status. *Ann Intern Med* 1990;112:89-95.
18. Kolanowski J, Youniss LT, Vanbutsele R, Detry JM. Effect of dexfenfluramine treatment on body weight, blood pressure and noradrenergic activity in obese hypertensive patients. *Eur J Clin Pharmacol* 1992;42:599-605.
19. Fagerberg B, Berglund A, Andersson OK, Berglund G. Weight reduction versus antihypertensive drug therapy in obese men with high blood pressure: effects upon plasma insulin. *J Hypertens* 1992;10:1053-61.
20. Whelton PK, Appel LJ, Espeland MA, Applegate WB, Ettinger WH, Kostis JB, et al. Sodium reduction and weight loss in the treatment of hypertension in older patients. *JAMA* 1998;279:839-46.

**Table 3: Recommendations for weight loss to control and prevent hypertension**

| Recommendation                                                                                                                                              | Grade |
|-------------------------------------------------------------------------------------------------------------------------------------------------------------|-------|
| Height and weight should be measured and body mass index (BMI) calculated for all adults                                                                    | D     |
| A healthy BMI (20-25) is recommended for all adults to prevent hypertension                                                                                 | B     |
| All overweight hypertensive people (BMI > 25) should be advised to reduce their weight                                                                      | B     |
| Overweight patients (BMI > 25) should be advised to lose a minimum of 4.5 kg to reduce blood pressure                                                       | C     |
| A multifactorial approach to weight loss, incorporating diet instruction, increased physical activity and behaviour modification techniques, should be used | D     |

21. Elmer P, Grimm R, Laing S, Grandits G, Svendsen K, Van Heal N, et al. Lifestyle intervention: results of the Treatment of Mild Hypertension Study (TOMHS). *Prev Med* 1995;24:378-88.
22. Wassertheil-Smoller W, Blafox MD, Oberman AS, Langford HG, Davis BR, Wylie-Rosett JW. The Trial of Antihypertensive Interventions and Management (TAIM) study. *Arch Intern Med* 1992;152:131-6.
23. Hypertension Prevention Trial Research Group. The Hypertension Prevention Trial: three-year effects of dietary changes on blood pressure. *Arch Intern Med* 1990;150:153-62.
24. Stevens VJ, Corrigan SA, Obanzanek E, Bernauer E, Cook NR, Hebert P, et al. Weight loss intervention in phase I of the Trials of Hypertension Prevention. *Arch Intern Med* 1993;153:849-58.
25. Trials of Hypertension Prevention Collaborative Research Group. Effects of weight loss and sodium reduction intervention on blood pressure and hypertension incidence in overweight people with high-normal blood pressure. *Arch Intern Med* 1997;157:657-67.
26. *Report of the Task Force on the Treatment of Obesity*. Ottawa: Minister of Supply and Services Canada; 1991. Cat no. H-39-2011/1991E.
27. Connolly HM, Crary JL, McGood MD, Hensrud DD, Edwards BS, Edwards WD, et al. Valvular heart disease associated with fenfluramine-phentermine. *N Engl J Med* 1997;337:581-8.
28. Nonpharmacological interventions as an adjunct to the pharmacological treatment of hypertension: a statement by the World Hypertension League. *J Hum Hypertens* 1993;7:159-64.
29. National High Blood Pressure Education Program Working Group report on primary prevention of hypertension. *Arch Intern Med* 1993;153:186-208.
30. Abbott D, Campbell N, Carruthers-Czyzewski P, Chockalingam A, David M, Dunkley G, et al, for the Canadian Coalition for High Blood Pressure Prevention and Control Working Group. Guidelines for measurement of blood pressure, referral and follow-up, and lifestyle counselling. *Can J Public Health* 1994;2(Suppl 2):29s-43s.

---

**Reprint requests to:** Heart and Stroke Foundation of Canada,  
1402-222 Queen St., Ottawa ON K1P 5V9; fax 613 569-3278
